# Supplementary material for: Body Mass Index and Its Influence on Chronic Low Back Pain in the Spanish Population: A Secondary Analysis from the European Health Survey (2020)
Source: MDPI journal article supplement (doi:10.3390/biomedicines11082175), 2023-08-02
Supplement: s1 [file s1]

**Table S1.** Comparative analysis of the characteristics of the sample according to the prevalence of chronic low back pain

| Characteristics (n=19,716)                              | Chronic Low Back Pain |                       |                |
|---------------------------------------------------------|-----------------------|-----------------------|----------------|
|                                                         | Yes                   | No                    | <i>p</i> value |
| <b>Sex</b>                                              |                       |                       |                |
| Men                                                     | 37.2%                 | 50.2%                 | <0.001         |
| Women                                                   | 62.8%                 | 49.8%                 |                |
| <b>BMI</b>                                              |                       |                       |                |
| Underweight                                             | 1.7%                  | 2.0%                  | <0.001         |
| Normal                                                  | 32.6%                 | 45.3%                 |                |
| Overweight                                              | 42.7%                 | 38.2%                 |                |
| Obese                                                   | 23.0%                 | 14.6%                 |                |
| <b>Physical activity during occupational activities</b> |                       |                       |                |
| Sitting for most of the day                             | 44.3%                 | 37.2%                 | <0.001         |
| Standing for most of the day                            | 41.1%                 | 44.8%                 |                |
| Walking, carrying some weight, frequent displacements   | 10.4%                 | 13.4%                 |                |
| Tasks requiring high physical demand                    | 4.2%                  | 4.5%                  |                |
| <b>Physical activity in leisure time</b>                |                       |                       |                |
| Almost exclusively sedentary                            | 46.0%                 | 34.0%                 | <0.001         |
| Occasional physical or sporting activity                | 39.0%                 | 38.1%                 |                |
| Physical activity several times a month                 | 6.7%                  | 10.9%                 |                |
| Physical activity several times a week                  | 8.3%                  | 17.0%                 |                |
|                                                         | <b>Median (Q1-Q3)</b> | <b>Median (Q1-Q3)</b> |                |
| <b>Age (years)</b>                                      | 63.0 (52.0- 75.0)     | 50.0 (38.0- 65.0)     | <0.001         |
